# Supplementary material for: The Black Panther, Masculinity Barriers to Medical Care, and Colorectal Cancer Screening Intention Among Unscreened American Indian/Alaska Native, Black, and White Men
Source: PubMed Central journal article supplement (PMC9019156; doi:10.3389/fpubh.2022.814596), 2022-04-06
Supplement: Data_Sheet_1.pdf [file Data_Sheet_1.pdf]

**Supplementary Table 1: Masculinity barriers to medical care scale measures by race/ethnicity (n=891)**

|                                                                                                                     | Total |       | Black |       | White |       | AIAN |       | P-Value      |
|---------------------------------------------------------------------------------------------------------------------|-------|-------|-------|-------|-------|-------|------|-------|--------------|
|                                                                                                                     | No.   | Col % | No.   | Col % | No.   | Col % | No.  | Col % |              |
| <b>As a provider, I assure the needs of my family are met.</b>                                                      |       |       |       |       |       |       |      |       | <b>0.039</b> |
| Not at all                                                                                                          | 37    | 4.2   | 15    | 5.0   | 7     | 2.3   | 15   | 5.3   |              |
| Slightly True                                                                                                       | 66    | 7.4   | 31    | 10.3  | 19    | 6.2   | 16   | 5.6   |              |
| Moderately True                                                                                                     | 129   | 14.5  | 50    | 16.6  | 46    | 15.0  | 33   | 11.6  |              |
| Mostly True                                                                                                         | 191   | 21.4  | 51    | 16.9  | 72    | 23.5  | 68   | 23.9  |              |
| Completely True                                                                                                     | 468   | 52.5  | 154   | 51.2  | 162   | 52.9  | 152  | 53.5  |              |
| <b>As a provider, I take risks for my family even if I may get hurt or put myself in danger.</b>                    |       |       |       |       |       |       |      |       | <b>0.002</b> |
| Not at all                                                                                                          | 134   | 15.0  | 48    | 15.9  | 49    | 16.0  | 37   | 13.0  |              |
| Slightly True                                                                                                       | 112   | 12.6  | 36    | 12.0  | 43    | 14.1  | 33   | 11.6  |              |
| Moderately True                                                                                                     | 189   | 21.2  | 61    | 20.3  | 77    | 25.2  | 51   | 18.0  |              |
| Mostly True                                                                                                         | 169   | 19.0  | 56    | 18.6  | 67    | 21.9  | 46   | 16.2  |              |
| Completely True                                                                                                     | 287   | 32.2  | 100   | 33.2  | 70    | 22.9  | 117  | 41.2  |              |
| <b>As a provider, I have been influenced by male family members to be active in my family's life.</b>               |       |       |       |       |       |       |      |       | <b>0.111</b> |
| Not at all                                                                                                          | 158   | 17.7  | 52    | 17.3  | 48    | 15.7  | 58   | 20.4  |              |
| Slightly True                                                                                                       | 95    | 10.7  | 39    | 13.0  | 24    | 7.8   | 32   | 11.3  |              |
| Moderately True                                                                                                     | 189   | 21.2  | 63    | 20.9  | 68    | 22.2  | 58   | 20.4  |              |
| Mostly True                                                                                                         | 206   | 23.1  | 66    | 21.9  | 87    | 28.4  | 53   | 18.7  |              |
| Completely True                                                                                                     | 243   | 27.3  | 81    | 26.9  | 79    | 25.8  | 83   | 29.2  |              |
| <b>As a provider, I get an extra push to succeed for my family when I believe somebody is expecting me to fail.</b> |       |       |       |       |       |       |      |       | <b>0.007</b> |
| Not at all                                                                                                          | 146   | 16.4  | 40    | 13.3  | 53    | 17.3  | 53   | 18.7  |              |
| Slightly True                                                                                                       | 82    | 9.2   | 27    | 9.0   | 31    | 10.1  | 24   | 8.5   |              |
| Moderately True                                                                                                     | 207   | 23.2  | 72    | 23.9  | 79    | 25.8  | 56   | 19.7  |              |
| Mostly True                                                                                                         | 192   | 21.5  | 63    | 20.9  | 78    | 25.5  | 51   | 18.0  |              |
| Completely True                                                                                                     | 264   | 29.6  | 99    | 32.9  | 65    | 21.2  | 100  | 35.2  |              |

|                                                                                  |     |      |    |      |     |      |     |                  |
|----------------------------------------------------------------------------------|-----|------|----|------|-----|------|-----|------------------|
| <b>When it comes to my health, I figure problems out on my own.</b>              |     |      |    |      |     |      |     | <b>0.041</b>     |
| Not at all                                                                       | 95  | 10.7 | 38 | 12.6 | 25  | 8.2  | 32  | 11.3             |
| Slightly True                                                                    | 164 | 18.4 | 58 | 19.3 | 57  | 18.6 | 49  | 17.3             |
| Moderately True                                                                  | 250 | 28.1 | 74 | 24.6 | 105 | 34.3 | 71  | 25.0             |
| Mostly True                                                                      | 232 | 26.0 | 78 | 25.9 | 81  | 26.5 | 73  | 25.7             |
| Completely True                                                                  | 150 | 16.8 | 53 | 17.6 | 38  | 12.4 | 59  | 20.8             |
| <b>When it comes to my health, I rely on the opinions of others.</b>             |     |      |    |      |     |      |     | <b>0.001</b>     |
| Not at all                                                                       | 230 | 25.8 | 95 | 31.6 | 57  | 18.6 | 78  | 27.5             |
| Slightly True                                                                    | 205 | 23.0 | 59 | 19.6 | 71  | 23.2 | 75  | 26.4             |
| Moderately True                                                                  | 244 | 27.4 | 66 | 21.9 | 99  | 32.4 | 79  | 27.8             |
| Mostly True                                                                      | 132 | 14.8 | 52 | 17.3 | 50  | 16.3 | 30  | 10.6             |
| Completely True                                                                  | 80  | 9.0  | 29 | 9.6  | 29  | 9.5  | 22  | 7.7              |
| <b>When it comes to my health, I make my own decisions.</b>                      |     |      |    |      |     |      |     | <b>0.001</b>     |
| Not at all                                                                       | 39  | 4.4  | 24 | 8.0  | 5   | 1.6  | 10  | 3.5              |
| Slightly True                                                                    | 86  | 9.7  | 35 | 11.6 | 28  | 9.2  | 23  | 8.1              |
| Moderately True                                                                  | 203 | 22.8 | 76 | 25.2 | 67  | 21.9 | 60  | 21.1             |
| Mostly True                                                                      | 244 | 27.4 | 77 | 25.6 | 95  | 31.0 | 72  | 25.4             |
| Completely True                                                                  | 319 | 35.8 | 89 | 29.6 | 111 | 36.3 | 119 | 41.9             |
| <b>When it comes to my health, I rely on remedies that others suggest to me.</b> |     |      |    |      |     |      |     | <b>0.087</b>     |
| Not at all                                                                       | 198 | 22.2 | 78 | 25.9 | 60  | 19.6 | 60  | 21.1             |
| Slightly True                                                                    | 225 | 25.3 | 62 | 20.6 | 78  | 25.5 | 85  | 29.9             |
| Moderately True                                                                  | 247 | 27.7 | 76 | 25.2 | 94  | 30.7 | 77  | 27.1             |
| Mostly True                                                                      | 138 | 15.5 | 49 | 16.3 | 47  | 15.4 | 42  | 14.8             |
| Completely True                                                                  | 83  | 9.3  | 36 | 12.0 | 27  | 8.8  | 20  | 7.0              |
| <b>A problem with my health would be a big deal.</b>                             |     |      |    |      |     |      |     | <b>&lt;0.001</b> |
| Not at all                                                                       | 52  | 5.8  | 14 | 4.7  | 8   | 2.6  | 30  | 10.6             |
| Slightly True                                                                    | 101 | 11.3 | 23 | 7.6  | 36  | 11.8 | 42  | 14.8             |
| Moderately True                                                                  | 219 | 24.6 | 68 | 22.6 | 82  | 26.8 | 69  | 24.3             |

|                                                                    |     |      |     |      |     |      |     |      |
|--------------------------------------------------------------------|-----|------|-----|------|-----|------|-----|------|
| Mostly True                                                        | 219 | 24.6 | 69  | 22.9 | 90  | 29.4 | 60  | 21.1 |
| Completely True                                                    | 300 | 33.7 | 127 | 42.2 | 90  | 29.4 | 83  | 29.2 |
| <b>I wait until I am sure a problem with my health is serious.</b> |     |      |     |      |     |      |     |      |
| Not at all                                                         | 183 | 20.5 | 71  | 23.6 | 48  | 15.7 | 64  | 22.5 |
| Slightly True                                                      | 169 | 19.0 | 56  | 18.6 | 58  | 19.0 | 55  | 19.4 |
| Moderately True                                                    | 237 | 26.6 | 77  | 25.6 | 88  | 28.8 | 72  | 25.4 |
| Mostly True                                                        | 184 | 20.7 | 60  | 19.9 | 78  | 25.5 | 46  | 16.2 |
| Completely True                                                    | 118 | 13.2 | 37  | 12.3 | 34  | 11.1 | 47  | 16.5 |
| <b>I take action immediately when I have a health problem.</b>     |     |      |     |      |     |      |     |      |
| Not at all                                                         | 78  | 8.8  | 16  | 5.3  | 24  | 7.8  | 38  | 13.4 |
| Slightly True                                                      | 171 | 19.2 | 42  | 14.0 | 70  | 22.9 | 59  | 20.8 |
| Moderately True                                                    | 222 | 24.9 | 73  | 24.3 | 89  | 29.1 | 60  | 21.1 |
| Mostly True                                                        | 197 | 22.1 | 75  | 24.9 | 67  | 21.9 | 55  | 19.4 |
| Completely True                                                    | 223 | 25.0 | 95  | 31.6 | 56  | 18.3 | 72  | 25.4 |
| <b>A problem with my health will go away on its own.</b>           |     |      |     |      |     |      |     |      |
| Not at all                                                         | 332 | 37.3 | 104 | 34.6 | 108 | 35.3 | 120 | 42.3 |
| Slightly True                                                      | 200 | 22.4 | 65  | 21.6 | 73  | 23.9 | 62  | 21.8 |
| Moderately True                                                    | 194 | 21.8 | 55  | 18.3 | 77  | 25.2 | 62  | 21.8 |
| Mostly True                                                        | 109 | 12.2 | 50  | 16.6 | 35  | 11.4 | 24  | 8.5  |
| Completely True                                                    | 56  | 6.3  | 27  | 9.0  | 13  | 4.2  | 16  | 5.6  |
| <b>It is important to talk to others about my feelings.</b>        |     |      |     |      |     |      |     |      |
| Not at all                                                         | 124 | 13.9 | 33  | 11.0 | 37  | 12.1 | 54  | 19.0 |
| Slightly True                                                      | 168 | 18.9 | 54  | 17.9 | 66  | 21.6 | 48  | 16.9 |
| Moderately True                                                    | 255 | 28.6 | 85  | 28.2 | 84  | 27.5 | 86  | 30.3 |
| Mostly True                                                        | 197 | 22.1 | 73  | 24.3 | 77  | 25.2 | 47  | 16.5 |
| Completely True                                                    | 147 | 16.5 | 56  | 18.6 | 42  | 13.7 | 49  | 17.3 |
| <b>I believe in remaining strong at all times.</b>                 |     |      |     |      |     |      |     |      |
| Not at all                                                         | 36  | 4.0  | 12  | 4.0  | 10  | 3.3  | 14  | 4.9  |

**0.04**

**<0.001**

**0.009**

**0.018**

**0.008**

|                 |     |      |     |      |    |      |     |      |
|-----------------|-----|------|-----|------|----|------|-----|------|
| Slightly True   | 80  | 9.0  | 35  | 11.6 | 30 | 9.8  | 15  | 5.3  |
| Moderately True | 196 | 22.0 | 53  | 17.6 | 81 | 26.5 | 62  | 21.8 |
| Mostly True     | 261 | 29.3 | 85  | 28.2 | 97 | 31.7 | 79  | 27.8 |
| Completely True | 318 | 35.7 | 116 | 38.5 | 88 | 28.8 | 114 | 40.1 |

**Acknowledging my own emotions is always helpful.**

**0.001**

|                 |     |      |    |      |    |      |    |      |
|-----------------|-----|------|----|------|----|------|----|------|
| Not at all      | 65  | 7.3  | 17 | 5.6  | 15 | 4.9  | 33 | 11.6 |
| Slightly True   | 125 | 14.0 | 35 | 11.6 | 49 | 16.0 | 41 | 14.4 |
| Moderately True | 209 | 23.5 | 65 | 21.6 | 84 | 27.5 | 60 | 21.1 |
| Mostly True     | 245 | 27.5 | 85 | 28.2 | 93 | 30.4 | 67 | 23.6 |
| Completely True | 247 | 27.7 | 99 | 32.9 | 65 | 21.2 | 83 | 29.2 |

**Physical pain in my body would never lead me to show any emotions.**

**0.048**

|                 |     |      |    |      |    |      |    |      |
|-----------------|-----|------|----|------|----|------|----|------|
| Not at all      | 207 | 23.2 | 75 | 24.9 | 80 | 26.1 | 52 | 18.3 |
| Slightly True   | 181 | 20.3 | 55 | 18.3 | 65 | 21.2 | 61 | 21.5 |
| Moderately True | 234 | 26.3 | 74 | 24.6 | 90 | 29.4 | 70 | 24.6 |
| Mostly True     | 158 | 17.7 | 58 | 19.3 | 43 | 14.1 | 57 | 20.1 |
| Completely True | 111 | 12.5 | 39 | 13.0 | 28 | 9.2  | 44 | 15.5 |

**Having medical exams below the waist would disrespect my sexuality.**

**<0.001**

|                 |     |      |     |      |     |      |     |     |
|-----------------|-----|------|-----|------|-----|------|-----|-----|
| Not at all      | 589 | 66.1 | 166 | 55.1 | 210 | 68.6 | 213 | 75  |
| Slightly True   | 73  | 8.2  | 29  | 9.6  | 26  | 8.5  | 18  | 6.3 |
| Moderately True | 120 | 13.5 | 46  | 15.3 | 40  | 13.1 | 34  | 12  |
| Mostly True     | 65  | 7.3  | 34  | 11.3 | 23  | 7.5  | 8   | 2.8 |
| Completely True | 44  | 4.9  | 26  | 8.6  | 7   | 2.3  | 11  | 3.9 |

**Medical professionals touching me below the waist is fine when it relates to my health.**

**0.012**

|                 |     |      |     |      |     |      |     |      |
|-----------------|-----|------|-----|------|-----|------|-----|------|
| Not at all      | 57  | 6.4  | 26  | 8.6  | 12  | 3.9  | 19  | 6.7  |
| Slightly True   | 72  | 8.1  | 30  | 10.0 | 19  | 6.2  | 23  | 8.1  |
| Moderately True | 147 | 16.5 | 53  | 17.6 | 49  | 16.0 | 45  | 15.8 |
| Mostly True     | 177 | 19.9 | 63  | 20.9 | 73  | 23.9 | 41  | 14.4 |
| Completely True | 438 | 49.2 | 129 | 42.9 | 153 | 50.0 | 156 | 54.9 |

**Health problems below the waist would be embarrassing to me.**

|                 |     |      |    |      |    |      |     |      |
|-----------------|-----|------|----|------|----|------|-----|------|
| Not at all      | 291 | 32.7 | 94 | 31.2 | 87 | 28.4 | 110 | 38.7 |
| Slightly True   | 162 | 18.2 | 54 | 17.9 | 57 | 18.6 | 51  | 18   |
| Moderately True | 188 | 21.1 | 61 | 20.3 | 76 | 24.8 | 51  | 18   |
| Mostly True     | 136 | 15.3 | 44 | 14.6 | 55 | 18.0 | 37  | 13   |
| Completely True | 114 | 12.8 | 48 | 15.9 | 31 | 10.1 | 35  | 12.3 |

**0.056**

**I would be comfortable with others knowing about health problems below the waist.**

|                 |     |      |    |      |    |      |    |      |
|-----------------|-----|------|----|------|----|------|----|------|
| Not at all      | 247 | 27.7 | 84 | 27.9 | 84 | 27.5 | 79 | 27.8 |
| Slightly True   | 148 | 16.6 | 45 | 15.0 | 51 | 16.7 | 52 | 18.3 |
| Moderately True | 216 | 24.2 | 77 | 25.6 | 74 | 24.2 | 65 | 22.9 |
| Mostly True     | 148 | 16.6 | 50 | 16.6 | 53 | 17.3 | 45 | 15.8 |
| Completely True | 132 | 14.8 | 45 | 15.0 | 44 | 14.4 | 43 | 15.1 |

**0.989**

**Medical professionals want men of my race to live a long time.**

|                 |     |      |    |      |    |      |    |      |
|-----------------|-----|------|----|------|----|------|----|------|
| Not at all      | 97  | 10.9 | 38 | 12.6 | 19 | 6.2  | 40 | 14.1 |
| Slightly True   | 97  | 10.9 | 51 | 16.9 | 17 | 5.6  | 29 | 10.2 |
| Moderately True | 261 | 29.3 | 83 | 27.6 | 89 | 29.1 | 89 | 31.3 |
| Mostly True     | 211 | 23.7 | 70 | 23.3 | 83 | 27.1 | 58 | 20.4 |
| Completely True | 225 | 25.3 | 59 | 19.6 | 98 | 32.0 | 68 | 23.9 |

**<0.001**

**Men of my race are treated like guinea pigs by medical professionals.**

|                 |     |      |    |      |     |      |     |      |
|-----------------|-----|------|----|------|-----|------|-----|------|
| Not at all      | 358 | 40.2 | 75 | 24.9 | 170 | 55.6 | 113 | 39.8 |
| Slightly True   | 162 | 18.2 | 60 | 19.9 | 41  | 13.4 | 61  | 21.5 |
| Moderately True | 196 | 22   | 86 | 28.6 | 53  | 17.3 | 57  | 20.1 |
| Mostly True     | 94  | 10.5 | 39 | 13.0 | 25  | 8.2  | 30  | 10.6 |
| Completely True | 81  | 9.1  | 41 | 13.6 | 17  | 5.6  | 23  | 8.1  |

**<0.001**

**Men of my race trust medical professionals.**

|            |    |      |    |      |   |     |    |      |
|------------|----|------|----|------|---|-----|----|------|
| Not at all | 92 | 10.3 | 43 | 14.3 | 7 | 2.3 | 42 | 14.8 |
|------------|----|------|----|------|---|-----|----|------|

**<0.001**

|                                                           |     |      |    |      |     |      |     |                  |
|-----------------------------------------------------------|-----|------|----|------|-----|------|-----|------------------|
| Slightly True                                             | 168 | 18.9 | 80 | 26.6 | 30  | 9.8  | 58  | 20.4             |
| Moderately True                                           | 282 | 31.6 | 89 | 29.6 | 91  | 29.7 | 102 | 35.9             |
| Mostly True                                               | 223 | 25   | 54 | 17.9 | 112 | 36.6 | 57  | 20.1             |
| Completely True                                           | 126 | 14.1 | 35 | 11.6 | 66  | 21.6 | 25  | 8.8              |
| <b>Men of my race rarely receive quality medical care</b> |     |      |    |      |     |      |     | <b>&lt;0.001</b> |
| Not at all                                                | 220 | 24.7 | 46 | 15.3 | 109 | 35.6 | 65  | 22.9             |
| Slightly True                                             | 151 | 16.9 | 57 | 18.9 | 39  | 12.7 | 55  | 19.4             |
| Moderately True                                           | 236 | 26.5 | 91 | 30.2 | 61  | 19.9 | 84  | 29.6             |
| Mostly True                                               | 168 | 18.9 | 72 | 23.9 | 56  | 18.3 | 40  | 14.1             |
| Completely True                                           | 116 | 13   | 35 | 11.6 | 41  | 13.4 | 40  | 14.1             |

**Supplementary Table 2: Sociodemographic characteristics of men aged 45 and above (n=435) (Dates of data collection)**

| <b>Race and Ethnicity</b>      |              |              |              |              |              |              |             |              |                |
|--------------------------------|--------------|--------------|--------------|--------------|--------------|--------------|-------------|--------------|----------------|
|                                | <b>Total</b> |              | <b>Black</b> |              | <b>White</b> |              | <b>AIAN</b> |              | <b>P-value</b> |
|                                | <b>No.</b>   | <b>Col %</b> | <b>No.</b>   | <b>Col %</b> | <b>No.</b>   | <b>Col %</b> | <b>No.</b>  | <b>Col %</b> |                |
| <b>Age Group</b>               |              |              |              |              |              |              |             |              | <b>0.6</b>     |
| 45-59                          | 215          | 49.4         | 46           | 46.5         | 104          | 52.0         | 65          | 47.8         |                |
| 60-75                          | 220          | 50.6         | 53           | 53.5         | 96           | 48.0         | 71          | 52.2         |                |
| <b>Census Region</b>           |              |              |              |              |              |              |             |              | <b>0.01</b>    |
| South                          | 101          | 23.3         | 30           | 30.3         | 39           | 19.5         | 32          | 23.9         |                |
| West                           | 153          | 35.3         | 28           | 28.3         | 66           | 33.0         | 59          | 44.0         |                |
| Northeast                      | 47           | 10.9         | 11           | 11.1         | 23           | 11.5         | 13          | 9.7          |                |
| Midwest                        | 98           | 22.6         | 26           | 26.3         | 47           | 23.5         | 25          | 18.7         |                |
| DC and Puerto Rico             | 34           | 7.9          | 4            | 4.0          | 25           | 12.5         | 5           | 3.7          |                |
| <b>Marital Status</b>          |              |              |              |              |              |              |             |              | <b>0.021</b>   |
| Single                         | 85           | 19.6         | 27           | 27.3         | 38           | 19.0         | 20          | 14.9         |                |
| Married/In a relationship      | 263          | 60.7         | 49           | 49.5         | 132          | 66.0         | 82          | 61.2         |                |
| Divorced/widowed/separated     | 85           | 19.6         | 23           | 23.2         | 30           | 15.0         | 32          | 23.9         |                |
| <b>Sexual Orientation</b>      |              |              |              |              |              |              |             |              | <b>0.227</b>   |
| Heterosexual                   | 405          | 93.5         | 97           | 98.0         | 186          | 93.0         | 122         | 91.0         |                |
| Homosexual                     | 13           | 3.0          | 2            | 2.0          | 6            | 3.0          | 5           | 3.7          |                |
| Bisexual/Questioning           | 15           | 3.5          | 0            | 0.0          | 8            | 4.0          | 7           | 5.2          |                |
| <b>Educational Attainment</b>  |              |              |              |              |              |              |             |              | <b>0.372</b>   |
| High school or below           | 90           | 20.8         | 19           | 19.2         | 37           | 18.5         | 34          | 25.4         |                |
| Some college/Associates degree | 166          | 38.3         | 40           | 40.4         | 73           | 36.5         | 53          | 39.6         |                |
| Bachelor's degree and above    | 177          | 40.9         | 40           | 40.4         | 90           | 45.0         | 47          | 35.1         |                |

|                                                   |     |      |    |      |     |      |     |      |  |                  |
|---------------------------------------------------|-----|------|----|------|-----|------|-----|------|--|------------------|
| <b>Health Professional</b>                        |     |      |    |      |     |      |     |      |  | <b>0.428</b>     |
| No                                                | 409 | 94.5 | 94 | 94.9 | 186 | 93.0 | 129 | 96.3 |  |                  |
| Yes                                               | 24  | 5.5  | 5  | 5.1  | 14  | 7.0  | 5   | 3.7  |  |                  |
| <b>Income Category</b>                            |     |      |    |      |     |      |     |      |  | <b>&lt;0.001</b> |
| 34,999 and below                                  | 158 | 36.6 | 33 | 33.7 | 55  | 27.5 | 70  | 52.2 |  |                  |
| 35,000-74,999                                     | 133 | 30.8 | 35 | 35.7 | 59  | 29.5 | 39  | 29.1 |  |                  |
| 75,000 and above                                  | 141 | 32.6 | 30 | 30.6 | 86  | 43.0 | 25  | 18.7 |  |                  |
| <b>Employed</b>                                   |     |      |    |      |     |      |     |      |  | <b>0.022</b>     |
| No                                                | 85  | 19.7 | 24 | 24.5 | 28  | 14.0 | 33  | 24.6 |  |                  |
| Yes                                               | 347 | 80.3 | 74 | 75.5 | 172 | 86.0 | 101 | 75.4 |  |                  |
| <b>Insurance Status</b>                           |     |      |    |      |     |      |     |      |  | <b>0.007</b>     |
| No                                                | 47  | 10.9 | 7  | 7.1  | 16  | 8.0  | 24  | 17.9 |  |                  |
| Yes                                               | 385 | 89.1 | 91 | 92.9 | 184 | 92.0 | 110 | 82.1 |  |                  |
| <b>Religious Affiliation</b>                      |     |      |    |      |     |      |     |      |  | <b>&lt;0.001</b> |
| Christian                                         | 296 | 68.5 | 73 | 74.5 | 143 | 71.5 | 80  | 59.7 |  |                  |
| Muslim                                            | 2   | 0.5  | 0  | 0.0  | 1   | 0.5  | 1   | 0.7  |  |                  |
| Atheist                                           | 32  | 7.4  | 4  | 4.1  | 25  | 12.5 | 3   | 2.2  |  |                  |
| Other                                             | 102 | 23.6 | 21 | 21.4 | 31  | 15.5 | 50  | 37.3 |  |                  |
| <b>Frequency of Religious Activity Attendance</b> |     |      |    |      |     |      |     |      |  | <b>&lt;0.001</b> |
| Never                                             | 139 | 32.2 | 19 | 19.4 | 79  | 39.5 | 41  | 30.6 |  |                  |
| Occasionally                                      | 184 | 42.6 | 46 | 46.9 | 69  | 34.5 | 69  | 51.5 |  |                  |
| Regular                                           | 109 | 25.2 | 33 | 33.7 | 52  | 26.0 | 24  | 17.9 |  |                  |
| <b>Current tobacco smoking frequency</b>          |     |      |    |      |     |      |     |      |  | <b>0.009</b>     |
| Daily                                             | 96  | 22.2 | 15 | 15.3 | 38  | 19.0 | 43  | 32.1 |  |                  |



|                                                                                         |     |      |    |       |     |      |     |      |                  |
|-----------------------------------------------------------------------------------------|-----|------|----|-------|-----|------|-----|------|------------------|
| Less than daily                                                                         | 22  | 5.1  | 7  | 7.1   | 6   | 3.0  | 9   | 6.7  |                  |
| Not at all                                                                              | 310 | 71.8 | 75 | 76.5  | 155 | 77.5 | 80  | 59.7 |                  |
| Don't know                                                                              | 4   | 0.9  | 1  | 1.0   | 1   | 0.5  | 2   | 1.5  |                  |
| <b>Has Regular Provider</b>                                                             |     |      |    |       |     |      |     |      | <b>0.282</b>     |
| No                                                                                      | 69  | 16.0 | 14 | 14.3  | 28  | 14.0 | 27  | 20.1 |                  |
| Yes                                                                                     | 363 | 84.0 | 84 | 85.7  | 172 | 86.0 | 107 | 79.9 |                  |
| <b>Has Seen Provider in Last 12 mos</b>                                                 |     |      |    |       |     |      |     |      | <b>0.413</b>     |
| No                                                                                      | 85  | 19.7 | 16 | 16.3  | 38  | 19.0 | 31  | 23.1 |                  |
| Yes                                                                                     | 347 | 80.3 | 82 | 83.7  | 162 | 81.0 | 103 | 76.9 |                  |
| <b>Family History of Cancer</b>                                                         |     |      |    |       |     |      |     |      | <b>0.366</b>     |
| No                                                                                      | 250 | 57.9 | 62 | 63.3  | 112 | 56.0 | 76  | 56.7 |                  |
| Yes                                                                                     | 153 | 35.4 | 31 | 31.6  | 77  | 38.5 | 45  | 33.6 |                  |
| Not sure                                                                                | 29  | 6.7  | 5  | 5.1   | 11  | 5.5  | 13  | 9.7  |                  |
| <b>Family History of CRC</b>                                                            |     |      |    |       |     |      |     |      | <b>0.622</b>     |
| No                                                                                      | 359 | 83.1 | 81 | 82.7  | 165 | 82.5 | 113 | 84.3 |                  |
| Yes                                                                                     | 33  | 7.6  | 10 | 10.2  | 16  | 8.0  | 7   | 5.2  |                  |
| Not sure                                                                                | 40  | 9.3  | 7  | 7.1   | 19  | 9.5  | 14  | 10.4 |                  |
| <b>Ever Diagnosed with CRC</b>                                                          |     |      |    |       |     |      |     |      | <b>0.618</b>     |
| No                                                                                      | 429 | 99.3 | 98 | 100.0 | 198 | 99.0 | 133 | 99.3 |                  |
| Yes                                                                                     | 3   | 0.7  | 0  | 0.0   | 2   | 1.0  | 1   | 0.7  |                  |
| <b>Did the recent death of Chadwick<br/>Boseman increase your awareness of<br/>CRC?</b> |     |      |    |       |     |      |     |      | <b>&lt;0.001</b> |
| No                                                                                      | 301 | 69.7 | 43 | 43.9  | 148 | 74.0 | 110 | 82.1 |                  |
| Yes                                                                                     | 131 | 30.3 | 55 | 56.1  | 52  | 26.0 | 24  | 17.9 |                  |

**Supplementary Table 3: Masculinity barriers to medical care scale measures by race/ethnicity among respondents 45+ (n=432)**

|                                                                                                                     | Total |       | Black |       | White |       | AIAN |       | P-Value      |
|---------------------------------------------------------------------------------------------------------------------|-------|-------|-------|-------|-------|-------|------|-------|--------------|
|                                                                                                                     | No.   | Col % | No.   | Col % | No.   | Col % | No.  | Col % |              |
| <b>As a provider, I assure the needs of my family are met.</b>                                                      |       |       |       |       |       |       |      |       | <b>0.559</b> |
| Not at all                                                                                                          | 10    | 2.3   | 1     | 1.0   | 5     | 2.5   | 4    | 3.0   |              |
| Slightly True                                                                                                       | 12    | 2.8   | 2     | 2.1   | 5     | 2.5   | 5    | 3.7   |              |
| Moderately True                                                                                                     | 46    | 10.7  | 12    | 12.4  | 24    | 12.0  | 10   | 7.5   |              |
| Mostly True                                                                                                         | 96    | 22.3  | 16    | 16.5  | 50    | 25.0  | 30   | 22.4  |              |
| Completely True                                                                                                     | 267   | 61.9  | 66    | 68.0  | 116   | 58.0  | 85   | 63.4  |              |
| <b>As a provider, I take risks for my family even if I may get hurt or put myself in danger.</b>                    |       |       |       |       |       |       |      |       | <b>0.003</b> |
| Not at all                                                                                                          | 86    | 20.0  | 21    | 21.6  | 44    | 22.0  | 21   | 15.7  |              |
| Slightly True                                                                                                       | 49    | 11.4  | 5     | 5.2   | 27    | 13.5  | 17   | 12.7  |              |
| Moderately True                                                                                                     | 92    | 21.3  | 21    | 21.6  | 47    | 23.5  | 24   | 17.9  |              |
| Mostly True                                                                                                         | 80    | 18.6  | 17    | 17.5  | 44    | 22.0  | 19   | 14.2  |              |
| Completely True                                                                                                     | 124   | 28.8  | 33    | 34.0  | 38    | 19.0  | 53   | 39.6  |              |
| <b>As a provider, I have been influenced by male family members to be active in my family's life.</b>               |       |       |       |       |       |       |      |       | <b>0.315</b> |
| Not at all                                                                                                          | 87    | 20.2  | 22    | 22.7  | 39    | 19.5  | 26   | 19.4  |              |
| Slightly True                                                                                                       | 38    | 8.8   | 8     | 8.2   | 12    | 6.0   | 18   | 13.4  |              |
| Moderately True                                                                                                     | 87    | 20.2  | 19    | 19.6  | 42    | 21.0  | 26   | 19.4  |              |
| Mostly True                                                                                                         | 100   | 23.2  | 21    | 21.6  | 55    | 27.5  | 24   | 17.9  |              |
| Completely True                                                                                                     | 119   | 27.6  | 27    | 27.8  | 52    | 26.0  | 40   | 29.9  |              |
| <b>As a provider, I get an extra push to succeed for my family when I believe somebody is expecting me to fail.</b> |       |       |       |       |       |       |      |       | <b>0.015</b> |
| Not at all                                                                                                          | 92    | 21.3  | 13    | 13.4  | 43    | 21.5  | 36   | 26.9  |              |
| Slightly True                                                                                                       | 42    | 9.7   | 7     | 7.2   | 21    | 10.5  | 14   | 10.4  |              |
| Moderately True                                                                                                     | 98    | 22.7  | 25    | 25.8  | 50    | 25.0  | 23   | 17.2  |              |

|                        |            |             |           |             |           |             |           |             |
|------------------------|------------|-------------|-----------|-------------|-----------|-------------|-----------|-------------|
| Mostly True            | 93         | 21.6        | 23        | 23.7        | 50        | 25.0        | 20        | 14.9        |
| <b>Completely True</b> | <b>106</b> | <b>24.6</b> | <b>29</b> | <b>29.9</b> | <b>36</b> | <b>18.0</b> | <b>41</b> | <b>30.6</b> |

**When it comes to my health, I figure problems out on my own.**

**0.006**

|                 |     |      |    |      |    |      |    |      |
|-----------------|-----|------|----|------|----|------|----|------|
| Not at all      | 56  | 13.0 | 22 | 22.7 | 19 | 9.5  | 15 | 11.2 |
| Slightly True   | 80  | 18.6 | 13 | 13.4 | 41 | 20.5 | 26 | 19.4 |
| Moderately True | 134 | 31.1 | 27 | 27.8 | 74 | 37.0 | 33 | 24.6 |
| Mostly True     | 110 | 25.5 | 22 | 22.7 | 50 | 25.0 | 38 | 28.4 |
| Completely True | 51  | 11.8 | 13 | 13.4 | 16 | 8.0  | 22 | 16.4 |

**When it comes to my health, I rely on the opinions of others.**

**0.097**

|                 |     |      |    |      |    |      |    |      |
|-----------------|-----|------|----|------|----|------|----|------|
| Not at all      | 106 | 24.6 | 33 | 34.0 | 38 | 19.0 | 35 | 26.1 |
| Slightly True   | 104 | 24.1 | 22 | 22.7 | 47 | 23.5 | 35 | 26.1 |
| Moderately True | 124 | 28.8 | 19 | 19.6 | 70 | 35.0 | 35 | 26.1 |
| Mostly True     | 64  | 14.8 | 17 | 17.5 | 28 | 14.0 | 19 | 14.2 |
| Completely True | 33  | 7.7  | 6  | 6.2  | 17 | 8.5  | 10 | 7.5  |

**When it comes to my health, I make my own decisions.**

**0.435**

|                 |     |      |    |      |    |      |    |      |
|-----------------|-----|------|----|------|----|------|----|------|
| Not at all      | 11  | 2.6  | 5  | 5.2  | 4  | 2.0  | 2  | 1.5  |
| Slightly True   | 30  | 7.0  | 9  | 9.3  | 14 | 7.0  | 7  | 5.2  |
| Moderately True | 93  | 21.6 | 21 | 21.6 | 45 | 22.5 | 27 | 20.1 |
| Mostly True     | 136 | 31.6 | 29 | 29.9 | 68 | 34.0 | 39 | 29.1 |
| Completely True | 161 | 37.4 | 33 | 34.0 | 69 | 34.5 | 59 | 44.0 |

**When it comes to my health, I rely on remedies that others suggest to me.**

**0.013**

|                 |     |      |    |      |    |      |    |      |
|-----------------|-----|------|----|------|----|------|----|------|
| Not at all      | 121 | 28.1 | 36 | 37.1 | 49 | 24.5 | 36 | 26.9 |
| Slightly True   | 126 | 29.2 | 28 | 28.9 | 53 | 26.5 | 45 | 33.6 |
| Moderately True | 103 | 23.9 | 11 | 11.3 | 59 | 29.5 | 33 | 24.6 |
| Mostly True     | 59  | 13.7 | 13 | 13.4 | 30 | 15.0 | 16 | 11.9 |
| Completely True | 22  | 5.1  | 9  | 9.3  | 9  | 4.5  | 4  | 3.0  |

**A problem with my health would be a big deal.**

|                 |     |      |    |      |    |      |    |      |
|-----------------|-----|------|----|------|----|------|----|------|
| Not at all      | 17  | 3.9  | 2  | 2.1  | 4  | 2.0  | 11 | 8.2  |
| Slightly True   | 45  | 10.4 | 6  | 6.2  | 19 | 9.5  | 20 | 14.9 |
| Moderately True | 110 | 25.5 | 17 | 17.5 | 55 | 27.5 | 38 | 28.4 |
| Mostly True     | 118 | 27.4 | 23 | 23.7 | 62 | 31.0 | 33 | 24.6 |
| Completely True | 141 | 32.7 | 49 | 50.5 | 60 | 30.0 | 32 | 23.9 |

**<0.001****I wait until I am sure a problem with my health is serious.**

|                 |     |      |    |      |    |      |    |      |
|-----------------|-----|------|----|------|----|------|----|------|
| Not at all      | 105 | 24.4 | 35 | 36.1 | 37 | 18.5 | 33 | 24.6 |
| Slightly True   | 89  | 20.6 | 18 | 18.6 | 42 | 21.0 | 29 | 21.6 |
| Moderately True | 116 | 26.9 | 23 | 23.7 | 55 | 27.5 | 38 | 28.4 |
| Mostly True     | 87  | 20.2 | 13 | 13.4 | 54 | 27.0 | 20 | 14.9 |
| Completely True | 34  | 7.9  | 8  | 8.2  | 12 | 6.0  | 14 | 10.4 |

**0.011****I take action immediately when I have a health problem.**

|                 |     |      |    |      |    |      |    |      |
|-----------------|-----|------|----|------|----|------|----|------|
| Not at all      | 35  | 8.1  | 5  | 5.2  | 16 | 8.0  | 14 | 10.4 |
| Slightly True   | 94  | 21.8 | 14 | 14.4 | 50 | 25.0 | 30 | 22.4 |
| Moderately True | 103 | 23.9 | 20 | 20.6 | 59 | 29.5 | 24 | 17.9 |
| Mostly True     | 94  | 21.8 | 24 | 24.7 | 39 | 19.5 | 31 | 23.1 |
| Completely True | 105 | 24.4 | 34 | 35.1 | 36 | 18.0 | 35 | 26.1 |

**0.013****A problem with my health will go away on its own.**

|                 |     |      |    |      |    |      |    |      |
|-----------------|-----|------|----|------|----|------|----|------|
| Not at all      | 209 | 48.5 | 54 | 55.7 | 83 | 41.5 | 72 | 53.7 |
| Slightly True   | 98  | 22.7 | 19 | 19.6 | 52 | 26.0 | 27 | 20.1 |
| Moderately True | 85  | 19.7 | 14 | 14.4 | 48 | 24.0 | 23 | 17.2 |
| Mostly True     | 32  | 7.4  | 7  | 7.2  | 14 | 7.0  | 11 | 8.2  |
| Completely True | 7   | 1.6  | 3  | 3.1  | 3  | 1.5  | 1  | 0.7  |

**0.183****It is important to talk to others about my feelings.**

|               |    |      |    |      |    |      |    |      |
|---------------|----|------|----|------|----|------|----|------|
| Not at all    | 65 | 15.1 | 9  | 9.3  | 29 | 14.5 | 27 | 20.1 |
| Slightly True | 88 | 20.4 | 15 | 15.5 | 49 | 24.5 | 24 | 17.9 |

**0.199**

|                 |     |      |    |      |    |      |    |      |
|-----------------|-----|------|----|------|----|------|----|------|
| Moderately True | 138 | 32.0 | 37 | 38.1 | 58 | 29.0 | 43 | 32.1 |
| Mostly True     | 78  | 18.1 | 18 | 18.6 | 37 | 18.5 | 23 | 17.2 |
| Completely True | 62  | 14.4 | 18 | 18.6 | 27 | 13.5 | 17 | 12.7 |

**I believe in remaining strong at all times.**

**0.223**

|                 |     |      |    |      |    |      |    |      |
|-----------------|-----|------|----|------|----|------|----|------|
| Not at all      | 7   | 1.6  | 0  | 0.0  | 4  | 2.0  | 3  | 2.2  |
| Slightly True   | 35  | 8.1  | 10 | 10.3 | 20 | 10.0 | 5  | 3.7  |
| Moderately True | 103 | 23.9 | 21 | 21.6 | 52 | 26.0 | 30 | 22.4 |
| Mostly True     | 147 | 34.1 | 29 | 29.9 | 68 | 34.0 | 50 | 37.3 |
| Completely True | 139 | 32.3 | 37 | 38.1 | 56 | 28.0 | 46 | 34.3 |

**Acknowledging my own emotions is always helpful.**

**0.003**

|                 |     |      |    |      |    |      |    |      |
|-----------------|-----|------|----|------|----|------|----|------|
| Not at all      | 25  | 5.8  | 2  | 2.1  | 10 | 5.0  | 13 | 9.7  |
| Slightly True   | 67  | 15.5 | 7  | 7.2  | 34 | 17.0 | 26 | 19.4 |
| Moderately True | 111 | 25.8 | 26 | 26.8 | 61 | 30.5 | 24 | 17.9 |
| Mostly True     | 127 | 29.5 | 35 | 36.1 | 58 | 29.0 | 34 | 25.4 |
| Completely True | 101 | 23.4 | 27 | 27.8 | 37 | 18.5 | 37 | 27.6 |

**Physical pain in my body would never lead me to show any emotions.**

**0.001**

|                 |     |      |    |      |    |      |    |      |
|-----------------|-----|------|----|------|----|------|----|------|
| Not at all      | 120 | 27.8 | 33 | 34.0 | 64 | 32.0 | 23 | 17.2 |
| Slightly True   | 101 | 23.4 | 19 | 19.6 | 49 | 24.5 | 33 | 24.6 |
| Moderately True | 110 | 25.5 | 25 | 25.8 | 56 | 28.0 | 29 | 21.6 |
| Mostly True     | 66  | 15.3 | 12 | 12.4 | 23 | 11.5 | 31 | 23.1 |
| Completely True | 34  | 7.9  | 8  | 8.2  | 8  | 4.0  | 18 | 13.4 |

**Having medical exams below the waist would disrespect my sexuality.**

**0.307**

|                 |     |      |    |      |     |      |     |      |
|-----------------|-----|------|----|------|-----|------|-----|------|
| Not at all      | 351 | 81.4 | 76 | 78.4 | 162 | 81.0 | 113 | 84.3 |
| Slightly True   | 25  | 5.8  | 3  | 3.1  | 14  | 7.0  | 8   | 6    |
| Moderately True | 36  | 8.4  | 9  | 9.3  | 18  | 9.0  | 9   | 6.7  |
| Mostly True     | 15  | 3.5  | 7  | 7.2  | 5   | 2.5  | 3   | 2.2  |

|                 |   |     |   |     |   |     |   |     |
|-----------------|---|-----|---|-----|---|-----|---|-----|
| Completely True | 4 | 0.9 | 2 | 2.1 | 1 | 0.5 | 1 | 0.7 |
|-----------------|---|-----|---|-----|---|-----|---|-----|

**Medical professionals touching me below the waist is fine when it relates to my health.**

**0.324**

|                 |     |      |    |      |     |      |    |      |
|-----------------|-----|------|----|------|-----|------|----|------|
| Not at all      | 20  | 4.6  | 7  | 7.2  | 8   | 4.0  | 5  | 3.7  |
| Slightly True   | 22  | 5.1  | 5  | 5.2  | 8   | 4.0  | 9  | 6.7  |
| Moderately True | 50  | 11.6 | 14 | 14.4 | 26  | 13.0 | 10 | 7.5  |
| Mostly True     | 89  | 20.6 | 19 | 19.6 | 47  | 23.5 | 23 | 17.2 |
| Completely True | 250 | 58   | 52 | 53.6 | 111 | 55.5 | 87 | 64.9 |

**Health problems below the waist would be embarrassing to me.**

**0.045**

|                 |     |      |    |      |    |      |    |      |
|-----------------|-----|------|----|------|----|------|----|------|
| Not at all      | 174 | 40.4 | 44 | 45.4 | 65 | 32.5 | 65 | 48.5 |
| Slightly True   | 90  | 20.9 | 20 | 20.6 | 43 | 21.5 | 27 | 20.1 |
| Moderately True | 84  | 19.5 | 18 | 18.6 | 47 | 23.5 | 19 | 14.2 |
| Mostly True     | 51  | 11.8 | 11 | 11.3 | 30 | 15.0 | 10 | 7.5  |
| Completely True | 32  | 7.4  | 4  | 4.1  | 15 | 7.5  | 13 | 9.7  |

**I would be comfortable with others knowing about health problems below the waist.**

**0.994**

|                 |     |      |    |      |    |      |    |      |
|-----------------|-----|------|----|------|----|------|----|------|
| Not at all      | 119 | 27.6 | 29 | 29.9 | 56 | 28.0 | 34 | 25.4 |
| Slightly True   | 82  | 19   | 18 | 18.6 | 40 | 20.0 | 24 | 17.9 |
| Moderately True | 104 | 24.1 | 21 | 21.6 | 49 | 24.5 | 34 | 25.4 |
| Mostly True     | 65  | 15.1 | 15 | 15.5 | 28 | 14.0 | 22 | 16.4 |
| Completely True | 61  | 14.2 | 14 | 14.4 | 27 | 13.5 | 20 | 14.9 |

**Medical professionals want men of my race to live a long time.**

**0.002**

|                 |     |      |    |      |    |      |    |      |
|-----------------|-----|------|----|------|----|------|----|------|
| Not at all      | 30  | 7    | 9  | 9.3  | 9  | 4.5  | 12 | 9    |
| Slightly True   | 39  | 9    | 15 | 15.5 | 9  | 4.5  | 15 | 11.2 |
| Moderately True | 110 | 25.5 | 27 | 27.8 | 54 | 27.0 | 29 | 21.6 |
| Mostly True     | 126 | 29.2 | 29 | 29.9 | 54 | 27.0 | 43 | 32.1 |
| Completely True | 126 | 29.2 | 17 | 17.5 | 74 | 37.0 | 35 | 26.1 |

**Men of my race are treated like guinea pigs by medical professionals.**

|                 |     |      |    |      |     |      |    |      |
|-----------------|-----|------|----|------|-----|------|----|------|
| Not at all      | 214 | 49.7 | 23 | 23.7 | 129 | 64.5 | 62 | 46.3 |
| Slightly True   | 84  | 19.5 | 26 | 26.8 | 28  | 14.0 | 30 | 22.4 |
| Moderately True | 82  | 19   | 29 | 29.9 | 27  | 13.5 | 26 | 19.4 |
| Mostly True     | 27  | 6.3  | 9  | 9.3  | 10  | 5.0  | 8  | 6    |
| Completely True | 24  | 5.6  | 10 | 10.3 | 6   | 3.0  | 8  | 6    |

**<0.001**

**Men of my race trust medical professionals.**

|                 |     |      |    |      |    |      |    |      |
|-----------------|-----|------|----|------|----|------|----|------|
| Not at all      | 34  | 7.9  | 11 | 11.3 | 5  | 2.5  | 18 | 13.4 |
| Slightly True   | 73  | 16.9 | 30 | 30.9 | 17 | 8.5  | 26 | 19.4 |
| Moderately True | 129 | 29.9 | 27 | 27.8 | 59 | 29.5 | 43 | 32.1 |
| Mostly True     | 138 | 32   | 23 | 23.7 | 76 | 38.0 | 39 | 29.1 |
| Completely True | 57  | 13.2 | 6  | 6.2  | 43 | 21.5 | 8  | 6    |

**<0.001**

**Men of my race rarely receive quality medical care.**

|                 |     |      |    |      |    |      |    |      |
|-----------------|-----|------|----|------|----|------|----|------|
| Not at all      | 137 | 31.8 | 16 | 16.5 | 87 | 43.5 | 34 | 25.4 |
| Slightly True   | 74  | 17.2 | 22 | 22.7 | 22 | 11.0 | 30 | 22.4 |
| Moderately True | 95  | 22   | 28 | 28.9 | 32 | 16.0 | 35 | 26.1 |
| Mostly True     | 74  | 17.2 | 21 | 21.6 | 34 | 17.0 | 19 | 14.2 |
| Completely True | 51  | 11.8 | 10 | 10.3 | 25 | 12.5 | 16 | 11.9 |

**<0.001**

**Supplementary Table 4: Associations of masculinity barriers to health care with intention to screen for CRC among racial ethnic minority men aged 45 years and above**

|                                | Black Adult Men |             |             | White Adult Men |             |             | AIAN Adult Men |             |             |
|--------------------------------|-----------------|-------------|-------------|-----------------|-------------|-------------|----------------|-------------|-------------|
|                                | OR              | 95% CI      |             | OR              | 95% CI      |             | OR             | 95% CI      |             |
| <b>Overall Scale Score</b>     | <b>1.76</b>     | <b>0.57</b> | <b>5.45</b> | <b>0.50</b>     | <b>0.28</b> | <b>1.05</b> | <b>0.34</b>    | <b>0.14</b> | <b>0.84</b> |
| Provider Role                  | 0.68            | 0.25        | 1.84        | 0.71            | 0.38        | 1.33        | 1.04           | 0.46        | 2.35        |
| Health-Related Self-Reliance   | 1.85            | 0.66        | 5.13        | 1.82            | 1.00        | 3.35        | 0.88           | 0.38        | 2.02        |
| Health Problem Minimization    | 0.93            | 0.31        | 2.74        | 0.45            | 0.24        | 0.85        | 0.39           | 0.15        | 1.00        |
| Restrictive Emotionality       | 0.44            | 0.24        | 0.82        | 0.44            | 0.24        | 0.82        | 0.45           | 0.19        | 1.04        |
| Fear of being Perceived as Gay | 2.28            | 0.76        | 6.79        | 0.76            | 0.41        | 1.41        | 1.06           | 0.44        | 2.58        |
| Medical Mistrust               | 2.18            | 0.80        | 5.95        | 0.32            | 0.16        | 0.66        | 1.12           | 0.47        | 2.65        |

Adjusted for age, marital status, educational attainment, insurance status, regular provider, family history of CRC
